# Supplementary material for: Probing the nanoscale Schottky barrier of metal/semiconductor interfaces of Pt/CdSe/Pt nanodumbbells by conductive-probe atomic force microscopy
Source: Royal Society of Chemistry journal article supplement (doi:10.1039/c5nr02285a), 2015-01-01
Supplement: c5nr02285a1.pdf [file c5nr02285a1.pdf]

Supporting information for

**Probing the nanoscale Schottky barrier of metal/semiconductor  
interfaces of Pt/CdSe/Pt nanodumbbells by conductive-probe  
atomic force microscopy**

Sangku Kwon<sup>†,‡</sup>, Seon Joo Lee<sup>†,§</sup>, Sun Mi Kim<sup>†,‡</sup>, Youngkeun Lee<sup>†,‡</sup>, , Hyunjoon Song<sup>†,§</sup>, and  
Jeong Young Park<sup>\*,†,‡</sup>

<sup>†</sup>*Center for Nanomaterials and Chemical Reactions, Institute for Basic Science (IBS),  
Daejeon 305-701, Korea*

<sup>‡</sup>*Graduate School of EEWS, Korea Advanced Institute of Science and Technology (KAIST),  
Daejeon 305-701, Korea*

<sup>§</sup>*Department of Chemistry, Korea Advanced Institute of Science and Technology (KAIST),  
Daejeon 305-701, Korea*

\*To whom correspondence should be addressed. E-mail: jeongypark@kaist.ac.kr

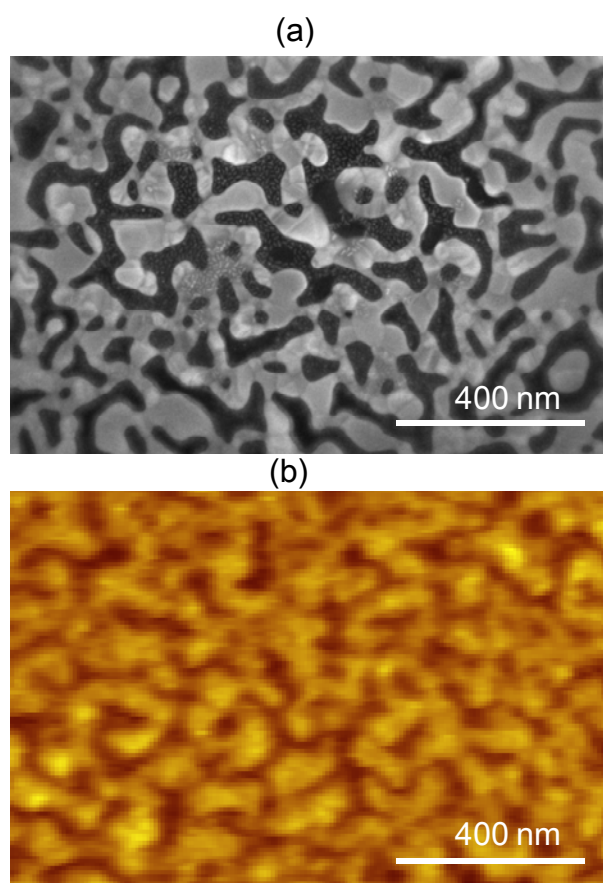

**Figure S1** (a) SEM and (b) AFM topography images of nanodumbbells on Au islands.

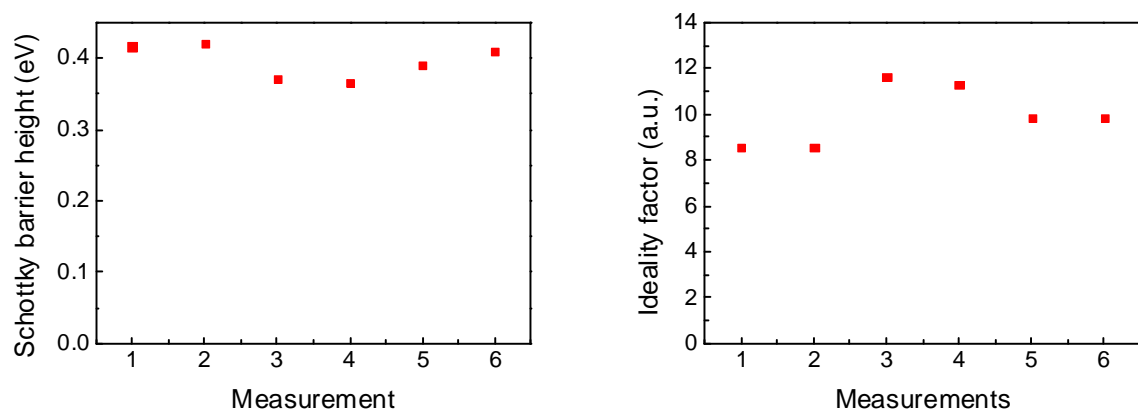

**Figure S2** Multiple measurements of Schottky barrier heights and ideality factors measured on six Pt-CdSe-Pt nanodumbbells that give rise to  $0.40 \pm 0.02$  eV and  $9.9 \pm 1.2$ , respectively.

## Estimation of the contact area

To estimate contact area between AFM tip and sample, we used Derjaguin-Muller-Toporov (DMT) continuum mechanical model. The contact area,  $A$ , is given by

$$A = \pi \left\{ \frac{R}{K} (L + 2\pi R\gamma) \right\}^{2/3}$$

Where  $K$  is the reduced Young's modulus

$$\frac{1}{K} = \frac{3}{4} \left( \frac{1 - \nu_s^2}{E_s} + \frac{1 - \nu_t^2}{E_t} \right)$$

$E_t$  and  $E_s$  are Young's moduli and  $\nu_t$  and  $\nu_s$  are the Poisson ratios of the tip and sample, respectively. ( $E_{\text{TiN}} = 600$  GPa,  $\nu_{\text{TiN}} = 0.25$ ,  $E_{\text{CdSe}} = 8$  GPa,  $\nu_{\text{CdSe}} = 0.3$ )  $R$  is the tip radius ( $\sim 35$  nm) and  $L$  is applied load ( $\sim 0$  nN).  $2\pi R\gamma$  is adhesion force ( $15.2 \pm 1.2$  nN) between tip and sample related to the work of adhesion,  $\gamma$ .
